# Supplementary material
Source: publisher site journal article supplement (https://static.cambridge.org/content/id/urn:cambridge.org:id:article:S0047279419000990/resource/name/S0047279419000990supp001.pdf)
Supplement: Supplementary file 1 [file S0047279419000990supp001.pdf]

**Appendix C: Additional results – intended for on-line publication only**

Table 5: Regression results on the spatial accessibility to nursery groups with  $dist_{max} = 1\text{km}$

| Accessibility based on<br>type of institution:                                                                                                                                                                                                                                                                                                                                                                                                                                                                     | All                |       | Public            |       | NPO                |       |
|--------------------------------------------------------------------------------------------------------------------------------------------------------------------------------------------------------------------------------------------------------------------------------------------------------------------------------------------------------------------------------------------------------------------------------------------------------------------------------------------------------------------|--------------------|-------|-------------------|-------|--------------------|-------|
|                                                                                                                                                                                                                                                                                                                                                                                                                                                                                                                    | Coeff.             | Sign. | Coeff.            | Sign. | Coeff.             | Sign. |
| <i>Status measure: educational level</i>                                                                                                                                                                                                                                                                                                                                                                                                                                                                           |                    |       |                   |       |                    |       |
| Education                                                                                                                                                                                                                                                                                                                                                                                                                                                                                                          | 0.146<br>(0.049)   | ***   | -0.270<br>(0.032) | ***   | 0.416<br>(0.038)   | ***   |
| Constant                                                                                                                                                                                                                                                                                                                                                                                                                                                                                                           | 3.144<br>(3.913)   |       | -1.542<br>(2.873) |       | 4.687<br>(2.665)   | *     |
| # observations                                                                                                                                                                                                                                                                                                                                                                                                                                                                                                     | 805,327            |       | 805,327           |       | 805,327            |       |
| Residuals clustered at                                                                                                                                                                                                                                                                                                                                                                                                                                                                                             | grid cell          |       | grid cell         |       | grid cell          |       |
| $R^2$                                                                                                                                                                                                                                                                                                                                                                                                                                                                                                              | 0.050              |       | 0.081             |       | 0.127              |       |
| <i>Status measure: income</i>                                                                                                                                                                                                                                                                                                                                                                                                                                                                                      |                    |       |                   |       |                    |       |
| Income                                                                                                                                                                                                                                                                                                                                                                                                                                                                                                             | 1.164<br>(0.243)   | ***   | -0.150<br>(0.214) |       | 1.314<br>(0.218)   | ***   |
| Constant                                                                                                                                                                                                                                                                                                                                                                                                                                                                                                           | -10.533<br>(5.070) | **    | 7.672<br>(3.875)  | *     | -18.205<br>(4.807) | ***   |
| # observations                                                                                                                                                                                                                                                                                                                                                                                                                                                                                                     | 805,327            |       | 805,327           |       | 805,327            |       |
| Residuals clustered at                                                                                                                                                                                                                                                                                                                                                                                                                                                                                             | district           |       | district          |       | district           |       |
| $R^2$                                                                                                                                                                                                                                                                                                                                                                                                                                                                                                              | 0.065              |       | 0.055             |       | 0.121              |       |
| <i>Status measure: house prices</i>                                                                                                                                                                                                                                                                                                                                                                                                                                                                                |                    |       |                   |       |                    |       |
| House prices                                                                                                                                                                                                                                                                                                                                                                                                                                                                                                       | 4.890<br>(0.602)   | ***   | -0.729<br>(0.347) | **    | 5.619<br>(0.549)   | ***   |
| Constant                                                                                                                                                                                                                                                                                                                                                                                                                                                                                                           | -9.203<br>(4.431)  | **    | 7.662<br>(3.061)  | **    | -16.865<br>(3.341) | ***   |
| # observations                                                                                                                                                                                                                                                                                                                                                                                                                                                                                                     | 805,327            |       | 805,327           |       | 805,327            |       |
| Residuals clustered at                                                                                                                                                                                                                                                                                                                                                                                                                                                                                             | SED                |       | SED               |       | SED                |       |
| $R^2$                                                                                                                                                                                                                                                                                                                                                                                                                                                                                                              | 0.080              |       | 0.056             |       | 0.154              |       |
| Notes: Accessibility measures are scaled by 1,000. All regressions include fixed year effects and additional variables on neighbourhood characteristics (on female employment rates, share of residents born in Austria or in other EU countries, and on connectivity). Standard errors are reported in parentheses and are based on standard errors that are clustered at the regional level at which the status measure is available. *** significant at 1 %, ** significant at 5%, * significant at 10 % level. |                    |       |                   |       |                    |       |

Table 6: Regression results on the accessibility to nursery groups interacting with time and  $dist_{max} = 1\text{km}$

| Accessibility based on<br>type of institution:                                                                                                                                                                                                                                                                                                                                                                                                                                                                                                                                                                     | All                |       | Public            |       | NPO                |       |
|--------------------------------------------------------------------------------------------------------------------------------------------------------------------------------------------------------------------------------------------------------------------------------------------------------------------------------------------------------------------------------------------------------------------------------------------------------------------------------------------------------------------------------------------------------------------------------------------------------------------|--------------------|-------|-------------------|-------|--------------------|-------|
|                                                                                                                                                                                                                                                                                                                                                                                                                                                                                                                                                                                                                    | Coeff.             | Sign. | Coeff.            | Sign. | Coeff.             | Sign. |
| <i>Status measure: educational level</i>                                                                                                                                                                                                                                                                                                                                                                                                                                                                                                                                                                           |                    |       |                   |       |                    |       |
| Education                                                                                                                                                                                                                                                                                                                                                                                                                                                                                                                                                                                                          | 0.101<br>(0.047)   | **    | -0.270<br>(0.031) | ***   | 0.371<br>(0.036)   | ***   |
| Education × time                                                                                                                                                                                                                                                                                                                                                                                                                                                                                                                                                                                                   | 0.013<br>(0.004)   | ***   | -0.000<br>(0.002) |       | 0.013<br>(0.004)   | ***   |
| Constant                                                                                                                                                                                                                                                                                                                                                                                                                                                                                                                                                                                                           | 3.882<br>(3.927)   |       | -1.550<br>(2.889) |       | 5.432<br>(2.663)   | **    |
| # observations                                                                                                                                                                                                                                                                                                                                                                                                                                                                                                                                                                                                     | 805,327            |       | 805,327           |       | 805,327            |       |
| Residuals clustered at                                                                                                                                                                                                                                                                                                                                                                                                                                                                                                                                                                                             | grid cell          |       | grid cell         |       | grid cell          |       |
| $R^2$                                                                                                                                                                                                                                                                                                                                                                                                                                                                                                                                                                                                              | 0.051              |       | 0.081             |       | 0.127              |       |
| <i>Status measure: income</i>                                                                                                                                                                                                                                                                                                                                                                                                                                                                                                                                                                                      |                    |       |                   |       |                    |       |
| Income                                                                                                                                                                                                                                                                                                                                                                                                                                                                                                                                                                                                             | 1.154<br>(0.205)   | ***   | -0.208<br>(0.227) |       | 1.362<br>(0.228)   | ***   |
| Income × time                                                                                                                                                                                                                                                                                                                                                                                                                                                                                                                                                                                                      | 0.003<br>(0.031)   |       | 0.016<br>(0.012)  |       | -0.013<br>(0.033)  |       |
| Constant                                                                                                                                                                                                                                                                                                                                                                                                                                                                                                                                                                                                           | -10.335<br>(4.935) | **    | 8.811<br>(3.616)  | **    | -19.146<br>(5.088) | ***   |
| # observations                                                                                                                                                                                                                                                                                                                                                                                                                                                                                                                                                                                                     | 805,327            |       | 805,327           |       | 805,327            |       |
| Residuals clustered at                                                                                                                                                                                                                                                                                                                                                                                                                                                                                                                                                                                             | district           |       | district          |       | district           |       |
| $R^2$                                                                                                                                                                                                                                                                                                                                                                                                                                                                                                                                                                                                              | 0.065              |       | 0.055             |       | 0.121              |       |
| <i>Status measure: house prices</i>                                                                                                                                                                                                                                                                                                                                                                                                                                                                                                                                                                                |                    |       |                   |       |                    |       |
| House prices                                                                                                                                                                                                                                                                                                                                                                                                                                                                                                                                                                                                       | 4.000<br>(0.573)   | ***   | -0.742<br>(0.336) | **    | 4.742<br>(0.530)   | ***   |
| House prices × time                                                                                                                                                                                                                                                                                                                                                                                                                                                                                                                                                                                                | 0.250<br>(0.056)   | ***   | 0.004<br>(0.021)  |       | 0.247<br>(0.052)   | ***   |
| Constant                                                                                                                                                                                                                                                                                                                                                                                                                                                                                                                                                                                                           | -5.995<br>(4.420)  |       | 7.709<br>(3.109)  | **    | -13.704<br>(3.278) | ***   |
| # observations                                                                                                                                                                                                                                                                                                                                                                                                                                                                                                                                                                                                     | 805,327            |       | 805,327           |       | 805,327            |       |
| Residuals clustered at                                                                                                                                                                                                                                                                                                                                                                                                                                                                                                                                                                                             | SED                |       | SED               |       | SED                |       |
| $R^2$                                                                                                                                                                                                                                                                                                                                                                                                                                                                                                                                                                                                              | 0.080              |       | 0.056             |       | 0.155              |       |
| Notes: Accessibility measures are scaled by 1,000. All regressions include fixed year effects and additional variables on neighbourhood characteristics (on female employment rates, share of residents born in Austria or in other EU countries, and on connectivity). The variable ‘time’ indicates the year of observation, going from 0 (for 2007) to 7 (for 2014). Standard errors are reported in parentheses and are based on standard errors that are clustered at the regional level at which the status measure is available. *** significant at 1 %, ** significant at 5%, * significant at 10 % level. |                    |       |                   |       |                    |       |

Table 7: Regression results on the spatial accessibility to nursery groups with  $f(dist) = dist^{-1}$

| Accessibility based on<br>type of institution:                                                                                                                                                                                                                                                                                                                                                                                                                                                                     | All       |       | Public    |       | NPO       |       |
|--------------------------------------------------------------------------------------------------------------------------------------------------------------------------------------------------------------------------------------------------------------------------------------------------------------------------------------------------------------------------------------------------------------------------------------------------------------------------------------------------------------------|-----------|-------|-----------|-------|-----------|-------|
|                                                                                                                                                                                                                                                                                                                                                                                                                                                                                                                    | Coeff.    | Sign. | Coeff.    | Sign. | Coeff.    | Sign. |
| <i>Status measure: educational level</i>                                                                                                                                                                                                                                                                                                                                                                                                                                                                           |           |       |           |       |           |       |
| Education                                                                                                                                                                                                                                                                                                                                                                                                                                                                                                          | 0.171     | ***   | -0.262    | ***   | 0.433     | ***   |
|                                                                                                                                                                                                                                                                                                                                                                                                                                                                                                                    | (0.050)   |       | (0.032)   |       | (0.040)   |       |
| Constant                                                                                                                                                                                                                                                                                                                                                                                                                                                                                                           | -0.294    |       | -3.533    |       | 3.239     |       |
|                                                                                                                                                                                                                                                                                                                                                                                                                                                                                                                    | (3.805)   |       | (2.737)   |       | (2.716)   |       |
| # observations                                                                                                                                                                                                                                                                                                                                                                                                                                                                                                     | 805,327   |       | 805,327   |       | 805,327   |       |
| Residuals clustered at                                                                                                                                                                                                                                                                                                                                                                                                                                                                                             | grid cell |       | grid cell |       | grid cell |       |
| $R^2$                                                                                                                                                                                                                                                                                                                                                                                                                                                                                                              | 0.050     |       | 0.075     |       | 0.115     |       |
| <i>Status measure: income</i>                                                                                                                                                                                                                                                                                                                                                                                                                                                                                      |           |       |           |       |           |       |
| Income                                                                                                                                                                                                                                                                                                                                                                                                                                                                                                             | 1.368     | ***   | -0.117    |       | 1.485     | ***   |
|                                                                                                                                                                                                                                                                                                                                                                                                                                                                                                                    | (0.285)   |       | (0.230)   |       | (0.246)   |       |
| Constant                                                                                                                                                                                                                                                                                                                                                                                                                                                                                                           | -16.358   | **    | 5.169     |       | -21.527   | ***   |
|                                                                                                                                                                                                                                                                                                                                                                                                                                                                                                                    | (6.049)   |       | (4.366)   |       | (5.544)   |       |
| # observations                                                                                                                                                                                                                                                                                                                                                                                                                                                                                                     | 805,327   |       | 805,327   |       | 805,327   |       |
| Residuals clustered at                                                                                                                                                                                                                                                                                                                                                                                                                                                                                             | district  |       | district  |       | district  |       |
| $R^2$                                                                                                                                                                                                                                                                                                                                                                                                                                                                                                              | 0.067     |       | 0.052     |       | 0.116     |       |
| <i>Status measure: house prices</i>                                                                                                                                                                                                                                                                                                                                                                                                                                                                                |           |       |           |       |           |       |
| House prices                                                                                                                                                                                                                                                                                                                                                                                                                                                                                                       | 5.466     | ***   | -0.675    | *     | 6.140     | ***   |
|                                                                                                                                                                                                                                                                                                                                                                                                                                                                                                                    | (0.707)   |       | (0.388)   |       | (0.643)   |       |
| Constant                                                                                                                                                                                                                                                                                                                                                                                                                                                                                                           | -14.337   | ***   | 5.339     | *     | -19.676   | ***   |
|                                                                                                                                                                                                                                                                                                                                                                                                                                                                                                                    | (4.870)   |       | (3.227)   |       | (3.663)   |       |
| # observations                                                                                                                                                                                                                                                                                                                                                                                                                                                                                                     | 805,327   |       | 805,327   |       | 805,327   |       |
| Residuals clustered at                                                                                                                                                                                                                                                                                                                                                                                                                                                                                             | SED       |       | SED       |       | SED       |       |
| $R^2$                                                                                                                                                                                                                                                                                                                                                                                                                                                                                                              | 0.081     |       | 0.053     |       | 0.147     |       |
| Notes: Accessibility measures are scaled by 1,000. All regressions include fixed year effects and additional variables on neighbourhood characteristics (on female employment rates, share of residents born in Austria or in other EU countries, and on connectivity). Standard errors are reported in parentheses and are based on standard errors that are clustered at the regional level at which the status measure is available. *** significant at 1 %, ** significant at 5%, * significant at 10 % level. |           |       |           |       |           |       |

Table 8: Regression results on the accessibility to nursery groups interacting with time and  $f(dist) = dist^{-1}$

| Accessibility based on<br>type of institution:                                                                                                                                                                                                                                                                                                                                                                                                                                                                                                                                                                     | All                |       | Public            |       | NPO                |       |
|--------------------------------------------------------------------------------------------------------------------------------------------------------------------------------------------------------------------------------------------------------------------------------------------------------------------------------------------------------------------------------------------------------------------------------------------------------------------------------------------------------------------------------------------------------------------------------------------------------------------|--------------------|-------|-------------------|-------|--------------------|-------|
|                                                                                                                                                                                                                                                                                                                                                                                                                                                                                                                                                                                                                    | Coeff.             | Sign. | Coeff.            | Sign. | Coeff.             | Sign. |
| <i>Status measure: educational level</i>                                                                                                                                                                                                                                                                                                                                                                                                                                                                                                                                                                           |                    |       |                   |       |                    |       |
| Education                                                                                                                                                                                                                                                                                                                                                                                                                                                                                                                                                                                                          | 0.128<br>(0.048)   | ***   | -0.260<br>(0.031) | ***   | 0.388<br>(0.038)   | ***   |
| Education × time                                                                                                                                                                                                                                                                                                                                                                                                                                                                                                                                                                                                   | 0.012<br>(0.004)   | ***   | -0.000<br>(0.002) |       | 0.013<br>(0.004)   | ***   |
| Constant                                                                                                                                                                                                                                                                                                                                                                                                                                                                                                                                                                                                           | 0.420<br>(3.816)   |       | -3.562<br>(2.745) |       | 3.982<br>(2.713)   |       |
| # observations                                                                                                                                                                                                                                                                                                                                                                                                                                                                                                                                                                                                     | 805,327            |       | 805,327           |       | 805,327            |       |
| Residuals clustered at                                                                                                                                                                                                                                                                                                                                                                                                                                                                                                                                                                                             | grid cell          |       | grid cell         |       | grid cell          |       |
| $R^2$                                                                                                                                                                                                                                                                                                                                                                                                                                                                                                                                                                                                              | 0.050              |       | 0.075             |       | 0.116              |       |
| <i>Status measure: income</i>                                                                                                                                                                                                                                                                                                                                                                                                                                                                                                                                                                                      |                    |       |                   |       |                    |       |
| Income                                                                                                                                                                                                                                                                                                                                                                                                                                                                                                                                                                                                             | 1.343<br>(0.238)   | ***   | -0.177<br>(0.243) |       | 1.520<br>(0.240)   | ***   |
| Income × time                                                                                                                                                                                                                                                                                                                                                                                                                                                                                                                                                                                                      | 0.007<br>(0.033)   |       | 0.017<br>(0.012)  |       | -0.010<br>(0.035)  |       |
| Constant                                                                                                                                                                                                                                                                                                                                                                                                                                                                                                                                                                                                           | -15.857<br>(5.885) | **    | 6.357<br>(4.058)  |       | -22.213<br>(5.703) | ***   |
| # observations                                                                                                                                                                                                                                                                                                                                                                                                                                                                                                                                                                                                     | 805,327            |       | 805,327           |       | 805,327            |       |
| Residuals clustered at                                                                                                                                                                                                                                                                                                                                                                                                                                                                                                                                                                                             | district           |       | district          |       | district           |       |
| $R^2$                                                                                                                                                                                                                                                                                                                                                                                                                                                                                                                                                                                                              | 0.067              |       | 0.052             |       | 0.116              |       |
| <i>Status measure: house prices</i>                                                                                                                                                                                                                                                                                                                                                                                                                                                                                                                                                                                |                    |       |                   |       |                    |       |
| House prices                                                                                                                                                                                                                                                                                                                                                                                                                                                                                                                                                                                                       | 4.493<br>(0.669)   | ***   | -0.692<br>(0.374) | *     | 5.186<br>(0.622)   | ***   |
| House prices × time                                                                                                                                                                                                                                                                                                                                                                                                                                                                                                                                                                                                | 0.274<br>(0.059)   | ***   | 0.005<br>(0.024)  |       | 0.269<br>(0.055)   | ***   |
| Constant                                                                                                                                                                                                                                                                                                                                                                                                                                                                                                                                                                                                           | -10.829<br>(4.868) | **    | 5.402<br>(3.289)  |       | -16.231<br>(3.591) | ***   |
| # observations                                                                                                                                                                                                                                                                                                                                                                                                                                                                                                                                                                                                     | 805,327            |       | 805,327           |       | 805,327            |       |
| Residuals clustered at                                                                                                                                                                                                                                                                                                                                                                                                                                                                                                                                                                                             | SED                |       | SED               |       | SED                |       |
| $R^2$                                                                                                                                                                                                                                                                                                                                                                                                                                                                                                                                                                                                              | 0.081              |       | 0.053             |       | 0.148              |       |
| Notes: Accessibility measures are scaled by 1,000. All regressions include fixed year effects and additional variables on neighbourhood characteristics (on female employment rates, share of residents born in Austria or in other EU countries, and on connectivity). The variable 'time' indicates the year of observation, going from 0 (for 2007) to 7 (for 2014). Standard errors are reported in parentheses and are based on standard errors that are clustered at the regional level at which the status measure is available. *** significant at 1 %, ** significant at 5%, * significant at 10 % level. |                    |       |                   |       |                    |       |

Table 9: Regression results on the spatial accessibility to nursery groups based on a summary index of neighbourhood quality

| Accessibility based on<br>type of institution:                                                                                                                                                                                                                                                                                                                                                                                                                                                                                                                                                                                                                                                                                                             | All               |       | Public            |       | NPO               |       |
|------------------------------------------------------------------------------------------------------------------------------------------------------------------------------------------------------------------------------------------------------------------------------------------------------------------------------------------------------------------------------------------------------------------------------------------------------------------------------------------------------------------------------------------------------------------------------------------------------------------------------------------------------------------------------------------------------------------------------------------------------------|-------------------|-------|-------------------|-------|-------------------|-------|
|                                                                                                                                                                                                                                                                                                                                                                                                                                                                                                                                                                                                                                                                                                                                                            | Coeff.            | Sign. | Coeff.            | Sign. | Coeff.            | Sign. |
| <i>Status measure: summary index</i>                                                                                                                                                                                                                                                                                                                                                                                                                                                                                                                                                                                                                                                                                                                       |                   |       |                   |       |                   |       |
| Neighbourhood quality                                                                                                                                                                                                                                                                                                                                                                                                                                                                                                                                                                                                                                                                                                                                      | 6.281<br>(0.840)  | ***   | -1.543<br>(0.476) | ***   | 7.824<br>(0.680)  | ***   |
| Constant                                                                                                                                                                                                                                                                                                                                                                                                                                                                                                                                                                                                                                                                                                                                                   | 13.041<br>(5.234) | **    | -1.551<br>(3.708) |       | 14.592<br>(3.732) | ***   |
| # observations                                                                                                                                                                                                                                                                                                                                                                                                                                                                                                                                                                                                                                                                                                                                             | 805,327           |       | 805,327           |       | 805,327           |       |
| Residuals clustered at                                                                                                                                                                                                                                                                                                                                                                                                                                                                                                                                                                                                                                                                                                                                     | grid cell         |       | grid cell         |       | grid cell         |       |
| $R^2$                                                                                                                                                                                                                                                                                                                                                                                                                                                                                                                                                                                                                                                                                                                                                      | 0.053             |       | 0.043             |       | 0.106             |       |
| <i>Status measure: summary index</i>                                                                                                                                                                                                                                                                                                                                                                                                                                                                                                                                                                                                                                                                                                                       |                   |       |                   |       |                   |       |
| Neighbourhood quality                                                                                                                                                                                                                                                                                                                                                                                                                                                                                                                                                                                                                                                                                                                                      | 5.496<br>(0.782)  | ***   | -1.607<br>(0.474) | ***   | 7.103<br>(0.640)  | ***   |
| Neighbourhood quality $\times$ time                                                                                                                                                                                                                                                                                                                                                                                                                                                                                                                                                                                                                                                                                                                        | 0.220<br>(0.074)  | ***   | 0.018<br>(0.022)  |       | 0.202<br>(0.069)  | ***   |
| Constant                                                                                                                                                                                                                                                                                                                                                                                                                                                                                                                                                                                                                                                                                                                                                   | 12.916<br>(5.228) | **    | -1.561<br>(3.707) |       | 14.477<br>(3.727) | ***   |
| # observations                                                                                                                                                                                                                                                                                                                                                                                                                                                                                                                                                                                                                                                                                                                                             | 805,327           |       | 805,327           |       | 805,327           |       |
| Residuals clustered at                                                                                                                                                                                                                                                                                                                                                                                                                                                                                                                                                                                                                                                                                                                                     | grid cell         |       | grid cell         |       | grid cell         |       |
| $R^2$                                                                                                                                                                                                                                                                                                                                                                                                                                                                                                                                                                                                                                                                                                                                                      | 0.053             |       | 0.043             |       | 0.106             |       |
| Notes: Accessibility measures are scaled by 1,000. Neighbourhood quality is measured by the mean of the standardized variables on education, income and house prices (see Cronbach, 1951). All regressions include fixed year effects and additional variables on neighbourhood characteristics (on female employment rates, share of residents born in Austria or in other EU countries, and on connectivity). The variable 'time' indicates the year of observation, going from 0 (for 2007) to 7 (for 2014). Standard errors are reported in parentheses and are based on standard errors that are clustered at the regional level at which the status measure is available. *** significant at 1 %, ** significant at 5%, * significant at 10 % level. |                   |       |                   |       |                   |       |

Table 10: Regression results on the spatial accessibility to nursery groups (control variables – Table 2 continued)

| Accessibility based on<br>type of institution: | All               |       | Public            |       | NPO               |       |
|------------------------------------------------|-------------------|-------|-------------------|-------|-------------------|-------|
|                                                | Coeff.            | Sign. | Coeff.            | Sign. | Coeff.            | Sign. |
| <i>Status measure: educational level</i>       |                   |       |                   |       |                   |       |
| Residents born in Austria                      | 0.216<br>(0.050)  | ***   | 0.240<br>(0.034)  | ***   | -0.024<br>(0.035) |       |
| Residents born in other EU state               | 0.189<br>(0.223)  |       | -0.068<br>(0.147) |       | 0.257<br>(0.166)  |       |
| Women in employment                            | 0.268<br>(0.081)  | ***   | 0.125<br>(0.055)  | **    | 0.143<br>(0.061)  | **    |
| Underground station                            | 5.411<br>(2.562)  | **    | 2.498<br>(1.416)  | *     | 2.912<br>(2.033)  |       |
| # observations                                 | 805,327           |       | 805,327           |       | 805,327           |       |
| Residuals clustered at                         | grid cell         |       | grid cell         |       | grid cell         |       |
| $R^2$                                          | 0.036             |       | 0.056             |       | 0.082             |       |
| <i>Status measure: income</i>                  |                   |       |                   |       |                   |       |
| Residents born in Austria                      | 0.080<br>(0.060)  |       | 0.180<br>(0.068)  | **    | -0.100<br>(0.078) |       |
| Residents born in other EU state               | 0.066<br>(0.244)  |       | -0.648<br>(0.154) | ***   | 0.714<br>(0.191)  | ***   |
| Women in employment                            | 0.339<br>(0.071)  | ***   | 0.079<br>(0.064)  |       | 0.260<br>(0.048)  | ***   |
| Underground station                            | 5.059<br>(2.567)  | *     | 2.550<br>(1.865)  |       | 2.509<br>(1.987)  |       |
| # observations                                 | 805,327           |       | 805,327           |       | 805,327           |       |
| Residuals clustered at                         | district          |       | district          |       | district          |       |
| $R^2$                                          | 0.046             |       | 0.041             |       | 0.080             |       |
| <i>Status measure: house prices</i>            |                   |       |                   |       |                   |       |
| Residents born in Austria                      | 0.183<br>(0.059)  | ***   | 0.169<br>(0.037)  | ***   | 0.014<br>(0.043)  |       |
| Residents born in other EU state               | -0.312<br>(0.201) |       | -0.636<br>(0.143) | ***   | 0.324<br>(0.143)  | **    |
| Women in employment                            | 0.347<br>(0.088)  | ***   | 0.080<br>(0.065)  |       | 0.267<br>(0.066)  | ***   |
| Underground station                            | 3.226<br>(2.460)  |       | 2.666<br>(1.396)  | *     | 0.560<br>(1.924)  |       |
| # observations                                 | 805,327           |       | 805,327           |       | 805,327           |       |
| Residuals clustered at                         | SED               |       | SED               |       | SED               |       |
| $R^2$                                          | 0.060             |       | 0.041             |       | 0.104             |       |

Notes: Accessibility measures are scaled by 1,000. Regression table includes parameter estimates on control variables on the regressions displayed in Table 2. Fixed year effects are included, but not reported for brevity. Standard errors are reported in parentheses and are based on standard errors that are clustered at the regional level at which the status measure is available. \*\*\* significant at 1 %, \*\* significant at 5%, \* significant at 10 % level.

Table 11: Regression results on the accessibility to nursery groups interacting with time (control variables – Table 3 continued)

| Accessibility based on<br>type of institution: | All               |       | Public            |       | NPO               |       |
|------------------------------------------------|-------------------|-------|-------------------|-------|-------------------|-------|
|                                                | Coeff.            | Sign. | Coeff.            | Sign. | Coeff.            | Sign. |
| <i>Status measure: educational level</i>       |                   |       |                   |       |                   |       |
| Residents born in Austria                      | 0.216<br>(0.050)  | ***   | 0.240<br>(0.034)  | ***   | -0.024<br>(0.035) |       |
| Residents born in other EU state               | 0.189<br>(0.223)  |       | -0.068<br>(0.147) |       | 0.257<br>(0.166)  |       |
| Women in employment                            | 0.268<br>(0.081)  | ***   | 0.125<br>(0.055)  | **    | 0.143<br>(0.061)  | **    |
| Underground station                            | 5.409<br>(2.563)  | **    | 2.498<br>(1.416)  | *     | 2.911<br>(2.034)  |       |
| # observations                                 | 805,327           |       | 805,327           |       | 805,327           |       |
| Residuals clustered at                         | grid cell         |       | grid cell         |       | grid cell         |       |
| $R^2$                                          | 0.036             |       | 0.056             |       | 0.082             |       |
| <i>Status measure: income</i>                  |                   |       |                   |       |                   |       |
| Residents born in Austria                      | 0.080<br>(0.060)  |       | 0.180<br>(0.068)  | **    | -0.100<br>(0.078) |       |
| Residents born in other EU state               | 0.066<br>(0.244)  |       | -0.648<br>(0.154) | ***   | 0.714<br>(0.191)  | ***   |
| Women in employment                            | 0.339<br>(0.071)  | ***   | 0.079<br>(0.064)  |       | 0.260<br>(0.048)  | ***   |
| Underground station                            | 5.060<br>(2.569)  | *     | 2.552<br>(1.866)  |       | 2.507<br>(1.989)  |       |
| # observations                                 | 805,327           |       | 805,327           |       | 805,327           |       |
| Residuals clustered at                         | district          |       | district          |       | district          |       |
| $R^2$                                          | 0.046             |       | 0.041             |       | 0.080             |       |
| <i>Status measure: house prices</i>            |                   |       |                   |       |                   |       |
| Residents born in Austria                      | 0.183<br>(0.059)  | ***   | 0.169<br>(0.037)  | ***   | 0.014<br>(0.043)  |       |
| Residents born in other EU state               | -0.312<br>(0.201) |       | -0.636<br>(0.143) | ***   | 0.324<br>(0.143)  | **    |
| Women in employment                            | 0.346<br>(0.088)  | ***   | 0.080<br>(0.065)  |       | 0.267<br>(0.066)  | ***   |
| Underground station                            | 3.236<br>(2.460)  |       | 2.666<br>(1.396)  | *     | 0.569<br>(1.924)  |       |
| # observations                                 | 805,327           |       | 805,327           |       | 805,327           |       |
| Residuals clustered at                         | SED               |       | SED               |       | SED               |       |
| $R^2$                                          | 0.060             |       | 0.041             |       | 0.105             |       |

Notes: Accessibility measures are scaled by 1,000. Regression table includes parameter estimates on control variables on the regressions displayed in Table 3. Fixed year effects are included, but not reported for brevity. Standard errors are reported in parentheses and are based on standard errors that are clustered at the regional level at which the status measure is available. \*\*\* significant at 1 %, \*\* significant at 5%, \* significant at 10 % level.
